# Newly identified relatives of botulinum neurotoxins shed light on their molecular evolution

\*Mansfield MJ<sup>1</sup>, \*Wentz TG<sup>2</sup>, Zhang S<sup>3</sup>, Lee EJ<sup>1</sup>, Dong M<sup>3</sup>, Sharma SK<sup>2#</sup>, Doxey AC<sup>1#</sup>

<sup>1</sup>Department of Biology, University of Waterloo, 200 University Ave. West, Waterloo, Ontario, N2L 3G1, Canada.

<sup>2</sup>Center for Food Safety and Applied Nutrition, United States Food and Drug Administration, College Park, MD, 20740

<sup>3</sup>Department of Urology, Boston Children's Hospital, Department of Microbiology and Immunobiology and Department of Surgery, Harvard Medical School, Boston, MA 02115, USA

\*Equal contribution.

#Correspondence should be addressed to A.C.D. ([acdoxey@uwaterloo.ca](mailto:acdoxey@uwaterloo.ca)) and S.K.S. ([Shashi.Sharma@fda.hhs.gov](mailto:Shashi.Sharma@fda.hhs.gov))

**Running head: Genome mining uncovers a family of botulinum-like toxins**

**Key Words:** Botulinum neurotoxins, bacterial toxins, *Chryseobacterium piperi*, *Clostridium*, *Actinobacteria*, *Streptomyces*, toxin evolution

## Abstract

The evolution of bacterial toxins is a central question to understanding the origins of human pathogens and infectious disease. Through genomic data mining, we traced the evolution of the deadliest known toxin family, clostridial neurotoxins, comprised of tetanus and botulinum neurotoxins (BoNT). We identified numerous uncharacterized lineages of BoNT-related genes in environmental species outside of *Clostridium*, revealing insights into their molecular ancestry. Phylogenetic analysis pinpointed a sister lineage of BoNT-like toxins in the gram-negative organism, *Chryseobacterium piperi*, that exhibit distant homology at the sequence level but preserve overall domain architecture. Resequencing and assembly of the *C. piperi* genome confirmed the presence of BoNT-like proteins encoded within two toxin-rich gene clusters. A *C. piperi* BoNT-like protein was validated as a novel toxin that induced necrotic cell death in human kidney cells. Mutagenesis of the putative active site abolished toxicity and indicated a zinc metalloprotease-dependent mechanism. The *C. piperi* toxin did not cleave common SNARE substrates of BoNTs, indicating that BoNTs have diverged from related families in substrate specificity. The new lineages of BoNT-like toxins identified by computational methods represent evolutionary missing links, and suggest an origin of clostridial neurotoxins from ancestral toxins present in environmental bacteria.

## Significance statement

The origins of bacterial toxins that cause human disease is a key question in our understanding of pathogen evolution. To explore this question, we searched genomes for evolutionary relatives of the deadliest biological toxins known to science, botulinum neurotoxins. Genomic and phylogenetic analysis revealed a group of toxins in the *Chryseobacterium piperi* genome that are a sister lineage to botulinum toxins. Genome sequencing of this organism confirmed the presence of toxin-rich gene clusters, and a predicted *C. piperi* toxin was shown to induce necrotic cell death in human cells. These newly predicted toxins are missing links in our understanding of botulinum neurotoxin evolution, revealing its origins from an ancestral family of toxins that may be widespread in the environment.

## Introduction

Despite a wealth of detailed knowledge on the structure-function relationship of many bacterial toxins (1–4), the evolutionary origins of important toxins responsible for human disease remain unclear (5, 6). Although bacterial toxins are typically studied in the context of their pathogenesis toward human cells, modern toxins are likely descendants of ancestral proteins that targeted different substrates, cell types and hosts. By identifying the evolutionary relatives of bacterial toxins in diverse environments (5), it may be possible to not only reconstruct these toxin evolutionary histories, but also identify sequence changes responsible for their unique activities (5–8).

Clostridial neurotoxins, including botulinum neurotoxins (BoNTs) and tetanus neurotoxin (TeNT), the causative agents of botulism and tetanus, are the most deadly toxins known to science with LD<sub>50</sub> values ranging from 0.1-1.0 ng per kg (9). Clostridial neurotoxins represent serious threats to public health and require constant monitoring by health agencies. Owing to their extreme toxicity, BoNTs are potential bioterrorism agents, and yet also have enormous utility as protein therapeutics (10, 11). BoNTs are produced by *Clostridium botulinum*, a polyphyletic taxon classified solely by the presence of the neurotoxin, and several other *Clostridium* species. Neurotoxin genes reside in distinct gene clusters encoded on the chromosome, plasmids or phages.

The extreme toxicity of BoNT is ultimately due to its structure and function. BoNTs are initially produced as a single polypeptide chain, which is then cleaved by a bacterial protease to result in a light-chain (LC) and heavy-chain (HC) which remain linked by a disulfide bond. A C-terminal

receptor-binding domain in the heavy chain ( $H_{CC}$ ), which adopts a ricin-type beta-trefoil structure, targets BoNTs to different neuronal receptors in the host, including SV2 for BoNT serotypes A/D/E/F, and synaptotagmin I/II for BoNT serotypes B/G with polysialogangliosides as co-receptors (12–23). After neuronal binding, BoNTs are internalized within endocytic vesicles. At low pH, the HC translocation domain, which forms an all alpha-helical bundle structure, transports the partially unfolded LC into the cytosol. The BoNT-LC, an ~400 residue N-terminal zinc metalloprotease domain, then cleaves intracellular SNARE proteins including VAMPs, SNAP25, and syntaxin 1 (24–27) to prevent exocytosis of synaptic vesicles, leading to flaccid paralysis (3).

The sophistication of BoNT's mechanism of action (see Rossetto et al. (3) for a thorough review) raises questions about its evolutionary origins. Recent work describing a divergent homolog of BoNTs in the genome of *Weissella oryzae*, suggests that BoNT-related proteins may not be limited to the *Clostridium* genus (8, 28). As the *Weissella* toxin is the only identified homolog outside of the BoNT family to date, however, it is unclear whether it represents a highly divergent pseudogene, or if it indicates the existence of a larger *bont*-like gene family present in a broader range of bacterial taxa.

Here we present a large-scale bioinformatic screen for putative BoNT-related toxin genes in all available genomes. Our search identified 161 BoNT-related genes in 30 different species. Predicted genes include new candidate toxins from *Chryseobacterium*, *Mycobacterium*, *Streptomyces*, and 19 species of entomopathogenic fungi, all containing signatures of toxin functionality. We identified toxin candidates in the *Chryseobacterium piperi* genome (29), which

we resequenced and verified to encode two toxin-containing gene clusters with tandem duplications reminiscent of BoNT-NTNH. Experimental validation of *C. piperi* toxins revealed a candidate toxin with metallopeptidase activity that arrested cell proliferation in human kidney cells. Phylogenetic analysis suggests that the *C. piperi* and other identified toxins are missing links that shed light on the evolution of BoNTs from ancestral protein toxins present in environmental bacteria.

## Results

### *Genomic data mining predicts BoNT-like toxins outside of Clostridium*

We screened the NCBI Genbank database (March 26, 2017) comprised of 94,396 prokaryotic, 4,123 eukaryotic, and 7,178 viral genomes, for potential homologs of BoNTs. Using PSI-BLAST with selected BoNT sequence queries (see Methods), we detected a total of 309 protein sequences displaying at least partial homology to BoNTs with an *E*-value below 0.001 (Table S1). The dataset includes all known BoNT serotypes, and an additional 161 BoNT-related sequences, all of which are experimentally uncharacterized to date. We performed all-by-all pairwise alignments and clustered the toxins using principal coordinates analysis (PCoA), which revealed three main sequence clusters (Fig. 1A). Cluster I includes a large family of putative ADP-ribosyltransferase toxins from entomopathogenic fungi, as well as diphtheria toxin, all possessing partial similarity only to the BoNT translocation domain (17.3% max sequence identity, PSI-BLAST *E*-value =  $7 \times 10^{-40}$ ). Cluster II includes type III effector proteases such as *Escherichia coli* NleD (peptidase family M91) which cleaves host JNK and p38 (30), and which possess remote detectable homology to the BoNT-LC with 14.9% max sequence identity and a PSI-BLAST *E*-value of  $4 \times 10^{-5}$  (see Methods).

The lower right cluster (III) contains BoNTs, NTNhs, the *Weissella* toxin and several uncharacterized proteins (Fig. 1A) that share multiple domains in common with BoNTs (Fig. 1B, Fig. S2) and are therefore of considerable interest (8, 31). Among the uncharacterized proteins are nine partial and full-length homologs from the genome of *Chryseobacterium piperi*, two from *Mycobacterium chelonae*, and five from other *Actinobacteria*. Some of these organisms are associated with disease; *Chryseobacterium* species are opportunistic pathogens (32, 33), *Acaricomes phytoseiuli* is a pathogen of mites (34), and *Mycobacterium chelonae* is a human pathogen associated with skin, soft tissue, and bone infections (35). We termed these proteins “BoNT-like toxins” given their evolutionary distance to BoNTs (Fig. 1A) and similarity of domain architecture (Fig. 1B). As shown for a representative protein from this group (putative *Chryseobacterium* toxin, “Cp1”, NCBI accession number WP\_034687872.1), these proteins possess a BoNT-like three domain architecture composed of a predicted metalloprotease domain, central translocation domain and C-terminal ricin-type beta-trefoil domain (Fig. 1B), each of which are analyzed further in detail below. Despite possessing detectable homology spanning multiple domains (Fig. S2), BoNT-like toxins have low sequence identity to BoNTs (17% identity between Cp1 and BoNT/A compared to  $\geq 28\%$  identity between BoNT family members) indicative of a distant evolutionary relationship.

### ***Chryseobacterium* toxins are a sister lineage to BoNTs**

Putative protease domains from BoNT-like toxins were aligned to the BoNT-LC to perform sequence, structural, and phylogenetic analysis (Fig. 2, Fig. S3, S4). Phylogenetically, BoNTs grouped into a distinct clade with BoNT/X and *Weissella* toxin forming divergent early

branching lineages (Fig. 2A, Fig. S4). A sister lineage consisting of the four *C. piperi* homologs and one *M. chelonae* homolog next grouped with the BoNT family with high statistical confidence (98% bootstrap support) (Fig. 2A, Fig. S4). Additional toxins from *Streptomyces* grouped next with this cluster, and finally a large clade of distantly related, type III effector proteases (M91 family) (Fig. 2A). Despite some variable segments and low sequence identity (BoNTA1/CP1: 17.9%), the protease domains from *C. piperi* and other BoNT-like toxins possess detectable homology to the BoNT-LC (bl2seq *E*-value =  $2 \times 10^{-6}$  between Cp1 and BoNT/A1) and conserve key functional residues found in BoNTs (Fig. 2B). These residues include: the critical HExxH zinc-coordinating active site motif; the third zinc ligand Glu-261; the functionally important Glu-350 which shapes active site fine structure, the active site stabilizing motif R363-x-x-Tyr366 (36), and the cysteine residues that form the disulfide bridge between BoNT LC and HC (37) (Fig. 2B).

Consistent with phylogenetic analysis, the predicted structure of *C. piperi* toxins are most similar to BoNT-LC (7.0Å RMSD versus 12.0Å for *E. coli* NleD) (Fig. 2A). One insertion is common to BoNT-LCs and BoNT-like toxins, and absent in NleD and other M91 proteases (Fig. 2A,B), which makes extensive contacts with SNAP25 (51 inter-residue contacts < 2 Å) and VAMP2 (91 inter-residue contacts < 2Å) in BoNT co-crystal complexes (Fig. S5). This insertion may therefore have contributed to an ancestral shift in substrate specificity between M27 and M91 protease families. A second C-terminal insertion common to BoNT-LC and BoNT-like toxins (Fig. 2A,B) forms part of the hydrophobic SNAP25 binding pocket (38), and has been shown to mediate catalytic activity and product removal (39).



In addition to LC conservation, *Chryseobacterium* and other BoNT-like toxins possess significant similarity to the BoNT translocation domain (22% identity, bl2seq *E*-value < 1 x 10<sup>-5</sup>), particularly across the region 593-686 in BoNT/A1 (Fig. S6), which forms a critical channel-forming amphipathic alpha helical motif (40–42). This region common to BoNTs and BoNT-like toxins is also highly similar to the membrane-inserting residues 286-325 of diphtheria toxin (helices TH5-TH6/TH7, PDB ID 4AE0) (43), consistent with a structural prediction for this region made by PHYRE (Fig. S2). In particular, the motif [K/R]x(8)PxxG is universally conserved among the translocation regions of all the identified toxins in our screen except the single-domain M91 family proteases (Fig. 1B, Fig. S6), highlighting it as a key sequence signature of translocation function.

Lastly, following the translocation domain, BoNT-like toxins possess a receptor-binding domain that is predicted to adopt the same fold as the BoNT H<sub>CC</sub> domain (Fig. 1B, Fig. S2). A ricin-type beta-trefoil fold was predicted for the C-terminal region of the putative *C. piperi* toxins by three separate methods (HHpred, Pfam, and Phyre with *E*-values < 0.001). Interestingly, a ricin-type beta-trefoil domain from the *C. botulinum* hemagglutinin, HA33, was identified as the top template by PHYRE (Fig. S2), indicating yet another link between the *C. piperi* toxins and BoNT clusters.

### ***Genome resequencing of Chryseobacterium piperi confirms presence of bont-like gene clusters***

The putative *C. piperi* toxins are located on three separate contigs (2, 44, and 59) in the original draft *C. piperi* genome (NCBI accession JPRJ01, 89 total contigs). To verify a *C. piperi* origin

for these contigs, rule out the possibility of sequencing artifacts, and enable further genome-wide analysis, *C. piperi* was acquired from ATCC and sequenced on Illumina MiSeq and Pacific Biosciences RS-II sequencing platforms. A closed genome 4.5Mbp in length, 35.3% GC content, and 250X coverage was produced and analysed (Fig. 3). The assembly revealed one toxin gene cluster (GC1) located at 1399-1432 kbp consisting of two *bont*-like genes, and a second toxin gene cluster (GC2) located at 3287-3312 kbp consisting of one *bont*-like gene (Fig. 3).

Similar to BoNT and BoNT/Wo gene clusters, *C. piperi* BoNT-like toxin genes are flanked by a neighboring gene (designated “NTNH-analog”) with detectable partial homology but lacking the conserved HExxH active site motif. Additionally, the *C. piperi* “NTNH-analog” genes uniquely feature a IBC1 (“Isoprenoid\_Biosyn\_C1 super family”) domain at the N-terminus similar to class I terpene-synthases whose role is unclear. No additional neurotoxin-associated proteins from the *ha/p47/orfx* families are present in these clusters.

Several genomic features surrounding the *C. piperi* toxin gene clusters indicate an origin via mobile element insertion. First, homologous regions to GC1 and GC2 were not detected in any other available *Chryseobacterium* genomes, suggesting non-*Chryseobacterium* origins. Second, numerous transposases are present including two IS110 family transposases, a IS200/IS605 transposase 18-40 kbp upstream (CJF12\_06430, CJF12\_06460, CJF12\_06500), and an IS1182 family transposase (CJF12\_05985) 30 kbp downstream of GC1. IS110 transposases have been previously shown to flank other *bont* gene clusters (44). A disrupted IS982 family transposase pseudogene (CJF12\_14555) is located immediately upstream of CJF12\_14550 and flanking GC2 are complete and partial IS1595 family, ISChpi, insertion sequences (CJF12\_14525 and

CJF12\_14620). Third, genes neighboring *Chryseobacterium* toxin gene clusters were found to possess homology to genes in *M. chelonae* (e.g., closest homolog of CJF12\_14560 was *M. chelonae* WP\_064393402.1, 71% amino acid identity), consistent with the detected similarity between the *C. piperi* toxins and *M. chelonae* genes (Fig. 2A).

### ***Chryseobacterium piperi* toxin: a novel BoNT-like toxin that induces necrotic cell death**

Given the substantial sequence variation between predicted *C. piperi* toxins, we selected WP\_034687872 (Cp1) for experimental characterization based on it having the greatest sequence identity to BoNTs (% id = 17%). Initial protease assays of recombinant Cp1 LC against known BoNT substrates, including VAMPs and SNAP25 SNARE proteins, yielded negative results (results not shown). Although the putative toxins from *Chryseobacterium* did not display activity against canonical BoNT targets, the conservation of the active site residues and similarity to M27 and M91 metalloproteases suggested the possibility of other targets. We elected to test for broad, metallopeptidase-induced toxicity via transfection and subsequent expression of the Cp1 LC cDNA in human embryonic kidney HEK293T cell line. CP1-LCs with active site knockouts at H209A and E210A, were utilized as negative controls.

As shown in Fig. 4A, the expression of wild-type CP1-LC resulted in a cell death phenotype in HEK293T cells. These cells stopped proliferating and were visibly shrunk, eventually dying and detaching from culture plates. Cell counts after 48 hours revealed an almost 4-fold reduction in the number of cells (Fig. 4B). No cell death phenotype or significant reduction in cell number was observed in the H209A and E210A mutants, confirming that the observed toxicity is metalloprotease-dependant. To further confirm the effect of CP1-LC, we performed cell

apoptosis assays by flow cytometry using Hoechst 33342, YO-PRO-1, and propidium iodide (Fig. 4C). In this assay, live cells (blue), apoptotic cells (blue and green), and dead cells (bright red) are visualized by fluorescence. The percentage of necrotic death was much higher (an approximately 65% increase, see boxed region) in cells transfected with CP1-LC than in cells transfected with control plasmid, H209A, or E210A mutants. In contrast, the percentages of cells labeled as apoptotic death did not change appreciably. These results suggest that expression of CP1-LC leads to necrotic death of cells, and that the cell death depends on the protease activity of CP1-LC. Although the specific target(s) of CP1-LC remains unknown at this point, CP1-LC is clearly an active toxin capable of disrupting cellular processes required for proliferation and survival of human cells.

## Discussion

Bacterial toxins such as BoNTs and TeNTs are causative agents of human disease but their evolutionary ancestry likely extends beyond the modern lineages in which they reside. Consistent with this idea, our survey of existing bacterial genomes revealed a diverse family of BoNT-related toxins outside of *Clostridium* including environmental strains of bacteria that are pathogens of non-human hosts (33). These new toxin genes expand the BoNT family and suggest BoNTs are a derived lineage of a broader and potentially ancient toxin family.

Following the recently discovered *Weissella* toxin, *Chryseobacterium* BoNT-like toxins appear to be the next closest evolutionary relatives to BoNTs. The identification of BoNT homologs that cluster outside of the BoNT family (Fig. 2A) and possess toxin activity (Fig. 4) raises the strong possibility that BoNTs evolved from precursor proteolytic toxins targeting different substrates.

By assessing the domain architectures of BoNT-like toxins in the context of the phylogenetic tree, it is possible to reconstruct a stepwise model of BoNT evolution (Fig. 5). This phylogenetic model suggests that BoNTs evolved from an ancestral toxin containing a M27-like protease domain, which in turn is related to the more distant M91 family of single domain type III effector proteases. The ancestral toxin also likely possessed a translocation domain that may have more closely resembled the T domain of diphtheria toxin. Finally, the ancestral toxin also likely possessed a receptor-binding region encoding a beta-trefoil ricin-type fold. Evolutionary novelties that occurred in the lineage leading to BoNTs appear to include extension of the translocation domain to include the large alpha-helical bundle, the gain of the N-terminal LamG-like binding domain, as well as the acquisition of toxin accessory genes neighbouring the proteolytic toxin gene (including NTNH and HA or P47/ORFX proteins). The increased sequence diversity of BoNT-like toxins, as well as the taxonomic diversity of their hosts, suggests that these represent early-branching lineages in BoNT evolution, and the canonical domain architecture of BoNTs has emerged more recently.

The future identification of the substrates targeted by *Chryseobacterium* toxin, *Weissella* toxin and others, combined with determination of their structure, will illuminate the specific evolutionary changes in the BoNT LC responsible for its gain of activity against neuronal SNAREs. We anticipate that this work will ultimately uncover a detailed model for the origin of the most deadly toxin known.

## Methods

### *Detection, comparison and analysis of bont-like genes*

Sequences were retrieved using PSI-BLAST with default parameters (BLOSUM62 scoring matrix; expect threshold 10; gap open 11; extension 1) from the nr database on (March 26, 2017) (45). Initial homologs were discovered by searching with BoNT/A1 (NCBI accession number ABS38337.1) with up to two rounds of PSI-BLAST. Then, in order to retrieve all possible sequences from each sequence family, different queries were used to search for specific BoNT homolog subfamilies (*Chryseobacterium*: WP\_034681281.1, *Actinobacteria*: *Streptomyces* sp. NBRC 110027 GAO13068.1, fungal: *Metarhizium anisopliae* KFG81441.1) and reiterating to convergence. BoNT homologs identified this way were added to a set of known BoNT and NTN proteins representing all known serotypes, including the recently discovered BoNT/F5A (KGO15617.1) and BoNT/X (KGO12225.1). Sets of T3SS effectors and diphtheria toxins were also retrieved via PSI-BLAST, with diphtheria toxin (PDB accession number 4AEO.1) and *E. coli* NleD (WP\_069191536.1) as the original queries. These sets of T3SS effectors and diphtheria toxins were pruned to remove identical sequences using Jalview (46). To obtain the *Austwickia* pseudogene corresponding to the diphtheria C domain, we translated the region immediately upstream of the protein containing diphtheria T and R domains (the region 39931-43386 on contig NZ\_BAGZ01000024.1 of *A. chelonae* NBRC 105200).

All-by-all sequence pairwise alignments were generated with needle (of the EMBOSS package, v6.6.0.0 (47)) with default parameters (gap open = 10, gap extend = 0.5, EBLOSUM62 scoring matrix). In Figure 1, percent similarity was used over percent identity in order to allow divergent homologs to cluster more accurately. Principal coordinate analysis was performed in R on a

distance matrix of pairwise similarity values using the default `dist()` and `cmdscale()` functions.

Domains were annotated with hmmscan (v3.1b2, available from <http://hmmer.org/>) against the Pfam database v31.0 (48) with an *E*-value cutoff of 1e-6. Annotations were subsequently confirmed by comparison to the Conserved Domain Database with relaxed cutoffs v3.16 (49), and alignment to BoNTs. Full domain annotations are available upon request. For Figure 1, the BoNT homologs with the most BoNT-like annotations were depicted to facilitate comparison between categories.

### ***Comparison of proteases from BoNTs, BoNT-like proteins and T3SS effector peptidases***

All BoNT homologs possessing a putative peptidase domain (i.e., possessing an HExxH motif) were aligned with BoNT and M91 peptidases using Clustal-Omega with defaults v1.2.1 (50), manipulated and colored in Jalview (46). Only regions corresponding to the peptidase domain boundaries were used, the positions of which were estimated based on alignment with domain boundaries of BoNT/A1 (PDB structure 3BTA). The same alignment procedure was used to identify the putative translocation region of BoNT homologs (Fig. S6). After identifying putative domains in BoNT homologs, the segments were combined and realigned.

A maximum likelihood phylogeny for BoNT, BoNT homolog and T3SS peptidases was generated using RAxML (v8.2.4, (51)) (see simplified cladogram in Fig. 5, for the full tree see Fig. S4). Bootstrap support was calculated using 100 rapid bootstraps.

### ***Structural modelling of BoNT-like proteins and T3SS effector peptidases***

Structural templates were identified for Cpl (*C. piperi*, accession WP\_034687872.1) using the LOMETS meta-server (52) on July 18, 2017. Templates (PDB IDs: 3BTA:A, 1XTG:A, 5BQN:A) were selected based on highest significant threading alignments (normalized Z-scores: 5.12-1.21, identity: 17%-21%). Structural modelling and refinement was done through I-TASSER (53), and the model with the lowest C-score was selected. For *E. coli* NleD, structural templates were identified through GeneSilico Metaservers (PDB IDs: 1Z7H:A, 1EPW:A, 3BWI:A, 3DEB:A, 3BON:A, 2QN0:A, 2A97:A, 3DDA:A, 1XTG:A, 1ZB7:A, 1F0L:A, 3FFZ:A, 1YVG:A, 2FPQ:A, 2G7K, 5BQN:A, 2NYY:A, 1T3C:A, 3V0A:A, 3FIE:A, 1RM8:A, 1E1H:A, 3VUO:A, 2A8A:A, 3D3X:A, 3DSE:A) were selected from COMA (score  $\leq 5.4\text{e-}07$ , identity: 19%), HHblits (score: 100, identity: 13%-20%), and HHsearch (score: 96.3, identity: 13%-19%) on July 15, 2017. Structural modelling was carried out through PRIMO's pipeline (54). Identified template sequences were aligned to M91 with T-Coffee Expresso (55), which uses 3D-Coffee to incorporate structural information during alignment. A total of 20 homology models were created with slow refinement based on the resulting alignment using MODELLER (56). The model with the lowest DOPE Z-Score was selected. Structural quality was assessed with Ramachandran plot analysis using PROCHECK (57). Models were visualized using Chimera (58).

### ***Re-sequencing of the *Chryseobacterium piperi* genome***

Methods, materials, and platforms used in the sequencing and assembly of *C. piperi* are described in Wentz et al. (59). The closed genome is accessible at the DDBJ/ENA/Genbank under the accession number CP023049. MiSeq and RS-II reads utilized in assembly are available



at NCBI SRA under accessions SRX3229522, SRX3231351, SRX3231352. Figure 3 was generated using the program Circos (60).

### ***HEK293T cell transfection and cell number counting***

HEK 293T cells were dispensed on 24-well plate at the density of  $0.2 \times 10^6$  cells/well. After 24 h, cells were transfected with 0.5  $\mu$ g vehicle vector (pcDNA3.1(+)), CP1-LC WT(1-398 aa, NCBI accession number WP\_034687872.1), CP1-LC H209A and CP1-LC E210Q plasmids with PolyJet reagent. Pictures were taken 48 h later after transfection. Cells numbers were counted in defined field ( $6 \times 6$  inch) from three different pictures.

### ***HEK293T cell death assay***

HEK293T cells were dispensed on 60 mm dish at the density of  $2.5 \times 10^6$  cells/dish. Cells were transfected with 2.5  $\mu$ g vehicle vector (pcDNA3.1(+)), CP1-LC WT, CP1-LC H209A and CP1-LC E210Q plasmids by using 5  $\mu$ L PolyJet. Cells were harvested 24 h after transfection and washed with cold phosphate-buffered saline (PBS). Cell density was adjusted to  $1 \times 10^6$  cells/mL. A mixture of 1  $\mu$ L Hoechst 33342, YO-PRO-1 and propidium iodide stock solution (Invitrogen) were added into a 1 mL cell suspension. Cells were incubated on ice for 30 minutes. Stained cells were analyzed by flow cytometry (BD/Cytek FACSCalibur DxP 11). UV excitation was used for detection of 460 nm emission of Hoechst 33342 dye, 488 nm excitation was used for detection of the 530 nm emission of YO-PRO-1 dye, and 575 nm emission of propidium iodide. Cell population separated into three groups: live cells showed only a low level of blue fluorescence, apoptotic cells showed bright green and blue fluorescence and dead cells showed bright red fluorescence.

## **Funding information**

This work was funded by an NSERC Discovery Grant and Ontario Early Researcher Award (ERA) to A.C.D. NIH grants (R01NS080833 and R01AI132387) to M.D. M.D. acknowledges support by the Harvard Digestive Disease Center (NIH P30DK034854) and Boston Children's Hospital Intellectual and Developmental Disabilities Research Center (NIH P30HD18655). M.D. holds the Investigator in the Pathogenesis of Infectious Disease award from the Burroughs Wellcome Fund. This work was partially supported by Department of Homeland Security Grant through Inter Agency Agreement. The funding agencies had no role in the design of the study, data collection, interpretation of data, or the decision to submit the work for publication.

## **Acknowledgments**

We thank Nagarajan Thirunavukkarasu, Sara Lomonaco, and Tim Muruvanda for their technical advice and useful discussions.

## **Author Contributions**

A.C.D., S.K.S. and M.D. conceived and coordinated the project. T.G.W. and S.K.S. performed genome sequencing. M.J.M, T.G.W., and A.C.D. performed bioinformatic analyses. S.Z. performed all biochemical analyses. All authors contributed to writing of the manuscript.

## **References**

1. Menestrina G, Schiavo G, Montecucco C (1994) Molecular mechanisms of action of bacterial protein toxins. *Mol Aspects Med* 15(2):79–193.
2. Binz T (2013) Clostridial neurotoxin light chains: devices for SNARE cleavage mediated blockade of neurotransmission. *Curr Top Microbiol Immunol* 364:139–57.
3. Rossetto O, Pirazzini M, Montecucco C (2014) Botulinum neurotoxins: genetic, structural

- and mechanistic insights. *Nat Rev Microbiol* 12(8):535–549.
4. Collier RJ (2001) Understanding the mode of action of diphtheria toxin: a perspective on progress during the 20th century. *Toxicon* 39(11):1793–803.
5. Montecucco C, Rasotto MB (2015) On botulinum neurotoxin variability. *MBio* 6(1):e02131-14.
6. Doxey AC, Lynch MDJ, Müller KM, Meiering EM, McConkey BJ (2008) Insights into the evolutionary origins of clostridial neurotoxins from analysis of the *Clostridium botulinum* strain A neurotoxin gene cluster. *BMC Evol Biol* 8:316.
7. DasGupta BR (2006) Botulinum neurotoxins: perspective on their existence and as polyproteins harboring viral proteases. *J Gen Appl Microbiol* 52(1):1–8.
8. Mansfield MJ, Adams JB, Doxey AC (2015) Botulinum neurotoxin homologs in non-*Clostridium* species. *FEBS Lett* 589(3):342–348.
9. Gill DM (1982) Bacterial toxins: a table of lethal amounts. *Microbiol Rev* 46(1):86–94.
10. Lim ECH, Seet RCS (2010) Use of botulinum toxin in the neurology clinic. *Nat Rev Neurol* 6(11):624–636.
11. Pirazzini M, Rossetto O, Eleopra R, Montecucco C (2017) Botulinum Neurotoxins: Biology, Pharmacology, and Toxicology. *Pharmacol Rev* 69(2):200–235.
12. Peng L, Tepp WH, Johnson EA, Dong M (2011) Botulinum Neurotoxin D Uses Synaptic Vesicle Protein SV2 and Gangliosides as Receptors. *PLoS Pathog* 7(3):e1002008.
13. Dong M, et al. (2003) Synaptotagmins I and II mediate entry of botulinum neurotoxin B into cells. *J Cell Biol* 162(7):1293–1303.
14. Nishiki T, et al. (1994) Identification of protein receptor for *Clostridium botulinum* type B neurotoxin in rat brain synaptosomes. *J Biol Chem* 269(14):10498–503.
15. Rummel A, Karnath T, Henke T, Bigalke H, Binz T (2004) Synaptotagmins I and II Act as Nerve Cell Receptors for Botulinum Neurotoxin G. *J Biol Chem* 279(29):30865–30870.
16. Dong M, et al. (2008) Glycosylated SV2A and SV2B mediate the entry of botulinum neurotoxin E into neurons. *Mol Biol Cell* 19(12):5226–37.
17. Dong M, et al. (2006) SV2 Is the Protein Receptor for Botulinum Neurotoxin A. *Science* (80- ) 312(5773):592–596.
18. Mahrhold S, Rummel A, Bigalke H, Davletov B, Binz T (2006) The synaptic vesicle protein 2C mediates the uptake of botulinum neurotoxin A into phrenic nerves. *FEBS Lett* 580(8):2011–4.
19. Rummel A, et al. (2009) Botulinum neurotoxins C, E and F bind gangliosides via a conserved binding site prior to stimulation-dependent uptake with botulinum neurotoxin F utilising the three isoforms of SV2 as second receptor. *J Neurochem* 110(6):1942–1954.
20. Fu Z, Chen C, Barbieri JT, Kim J-JP, Baldwin MR (2009) Glycosylated SV2 and gangliosides as dual receptors for botulinum neurotoxin serotype F. *Biochemistry* 48(24):5631–41.
21. Berntsson RP-A, Peng L, Dong M, Stenmark P (2013) Structure of dual receptor binding to botulinum neurotoxin B. *Nat Commun* 4:2058.
22. Chai Q, et al. (2006) Structural basis of cell surface receptor recognition by botulinum neurotoxin B. *Nature* 444(7122):1096–1100.
23. Jin R, Rummel A, Binz T, Brunker AT (2006) Botulinum neurotoxin B recognizes its protein receptor with high affinity and specificity. *Nature* 444(7122):1092–1095.
24. Binz T, Sikorra S, Mahrhold S (2010) Clostridial neurotoxins: mechanism of SNARE cleavage and outlook on potential substrate specificity reengineering. *Toxins (Basel)*

- 2(4):665–82.
25. Blasi J, et al. (1993) Botulinum neurotoxin C1 blocks neurotransmitter release by means of cleaving HPC-1/syntaxin. *EMBO J* 12(12):4821–8.
26. Schiavo G, Shone CC, Bennett MK, Scheller RH, Montecucco C (1995) Botulinum neurotoxin type C cleaves a single Lys-Ala bond within the carboxyl-terminal region of syntaxins. *J Biol Chem* 270(18):10566–70.
27. Pantano S, Montecucco C (2014) The blockade of the neurotransmitter release apparatus by botulinum neurotoxins. *Cell Mol Life Sci* 71(5):793–811.
28. Zorretta I, et al. (2016) The first non Clostridial botulinum-like toxin cleaves VAMP within the juxtamembrane domain. *Sci Rep* 6(1):30257.
29. Strahan BL, et al. (2011) *Chryseobacterium piperi* sp. nov., isolated from a freshwater creek. *Int J Syst Evol Microbiol* 61(9):2162–2166.
30. Creuzburg K, et al. (2017) The Type III Effector NleD from Enteropathogenic *Escherichia coli* Differentiates between Host Substrates p38 and JNK. *Infect Immun* 85(2):e00620-16.
31. Gu S, et al. (2012) Botulinum Neurotoxin Is Shielded by NTNHA in an Interlocked Complex. *Science* (80- ) 335(6071):977–981.
32. Bernardet J-F, Hugo C, Bruun B (2006) The Genera *Chryseobacterium* and *Elizabethkingia*. *The Prokaryotes* (Springer New York, New York, NY), pp 638–676.
33. Zamora L, Vela AI, Palacios MA, Domínguez L, Fernández-Garayzábal J (2012) First isolation and characterization of *Chryseobacterium shigense* from rainbow trout. *BMC Vet Res* 8(1):77.
34. Pukall R, Schumann P, Schütte C, Gols R, Dicke M (2006) *Acaricomes phytoseiuli* gen. nov., sp. nov., isolated from the predatory mite *Phytoseiulus persimilis*. *Int J Syst Evol Microbiol* 56(2):465–469.
35. Wallace RJ, Brown BA, Onyi GO (1992) Skin, Soft Tissue, and Bone Infections Due to *Mycobacterium chelonae chelonae*: Importance of Prior Corticosteroid Therapy, Frequency of Disseminated Infections, and Resistance to Oral Antimicrobials Other than Clarithromycin. *J Infect Dis* 166(2):405–412.
36. Binz T, Bade S, Rummel A, Kollwe A, Alves J (2002) Arg(362) and Tyr(365) of the botulinum neurotoxin type a light chain are involved in transition state stabilization. *Biochemistry* 41(6):1717–23.
37. Rossetto O, et al. (2001) Active-site mutagenesis of tetanus neurotoxin implicates TYR-375 and GLU-271 in metalloproteolytic activity. *Toxicon* 39(8):1151–9.
38. Silvaggi NR, Wilson D, Tzipori S, Allen KN (2008) Catalytic features of the botulinum neurotoxin A light chain revealed by high resolution structure of an inhibitory peptide complex. *Biochemistry* 47(21):5736–45.
39. Mizanur RM, et al. (2013) The C Terminus of the Catalytic Domain of Type A Botulinum Neurotoxin May Facilitate Product Release from the Active Site. *J Biol Chem* 288(33):24223–24233.
40. Montal MS, Blewitt R, Tomich JM, Montal M (1992) Identification of an ion channel-forming motif in the primary structure of tetanus and botulinum neurotoxins. *FEBS Lett* 313(1):12–8.
41. Lebeda FJ, Olson MA (1995) Structural predictions of the channel-forming region of botulinum neurotoxin heavy chain. *Toxicon* 33(4):559–567.
42. Fischer A, Sambashivan S, Brunger AT, Montal M (2012) Beltless Translocation Domain of Botulinum Neurotoxin A Embodies a Minimum Ion-conductive Channel. *J Biol Chem*

- 287(3):1657–1661.
43. Kienker PK, Wu Z, Finkelstein A (2016) Topography of the TH5 Segment in the Diphtheria Toxin T-Domain Channel. *J Membr Biol* 249(1–2):181–196.
44. Dover N, Barash JR, Hill KK, Xie G, Arnon SS (2014) Molecular Characterization of a Novel Botulinum Neurotoxin Type H Gene. *J Infect Dis* 209(2):192–202.
45. Altschul SF, et al. (1997) Gapped BLAST and PSI-BLAST: A new generation of protein database search programs. *Nucleic Acids Res* 25:3389–3402.
46. Waterhouse AM, Procter JB, Martin DMA, Clamp M, Barton GJ (2009) Jalview Version 2-A multiple sequence alignment editor and analysis workbench. *Bioinformatics* 25(9):1189–1191.
47. Rice P, Longden I, Bleasby A (2000) EMBOSS: The European Molecular Biology Open Software Suite. *Trends Genet* 16(6):276–277.
48. Finn RD, et al. (2016) The Pfam protein families database: towards a more sustainable future. *Nucleic Acids Res* 44(D1):D279–85.
49. Marchler-Bauer A, et al. (2015) CDD: NCBI’s conserved domain database. *Nucleic Acids Res* 43(D1):D222–D226.
50. Sievers F, et al. (2011) Fast, scalable generation of high-quality protein multiple sequence alignments using Clustal Omega. *Mol Syst Biol* 7(1):539.
51. Stamatakis A (2014) RAxML version 8: a tool for phylogenetic analysis and post-analysis of large phylogenies. *Bioinformatics* 30(9):1312–1313.
52. Wu S, Zhang Y (2007) LOMETS: A local meta-threading-server for protein structure prediction. *Nucleic Acids Res* 35(10):3375–3382.
53. Yang J, et al. (2014) The I-TASSER Suite: protein structure and function prediction. *Nat Methods* 12(1):7–8.
54. Hatherley R, Brown DK, Glenister M, Bishop ÖT (2016) PRIMO: An interactive homology modeling pipeline. *PLoS One* 11(11).
55. Armougom F, et al. (2006) Espresso: Automatic incorporation of structural information in multiple sequence alignments using 3D-Coffee. *Nucleic Acids Res* 34(WEB. SERV. ISS.).
56. Webb B, Sali A (2014) Comparative protein structure modeling using MODELLER. *Curr Protoc Bioinforma* 2014:5.6.1–5.6.32.
57. Laskowski RA, MacArthur MW, Moss DS, Thornton JM (1993) PROCHECK: a program to check the stereochemical quality of protein structures. *J Appl Crystallogr* 26(2):283–291.
58. Huang CC, Couch GS, Pettersen EF, Ferrin TE (1996) Chimera: An Extensible Molecular Modeling Application Constructed Using Standard Components. *Pacific Symp Biocomput* 1:724.
59. Wentz T, et al. (2017) Closed Genome of *Chryseobacterium piperi* str. CTM(T)/ATCC BAA-1782, a Gram-Negative Bacteria with Clostridial Neurotoxin-Like Coding Sequences. *Genome Announc* (in press).
60. Krzywinski M, et al. (2009) Circos: An information aesthetic for comparative genomics. *Genome Res* 19(9):1639–1645.

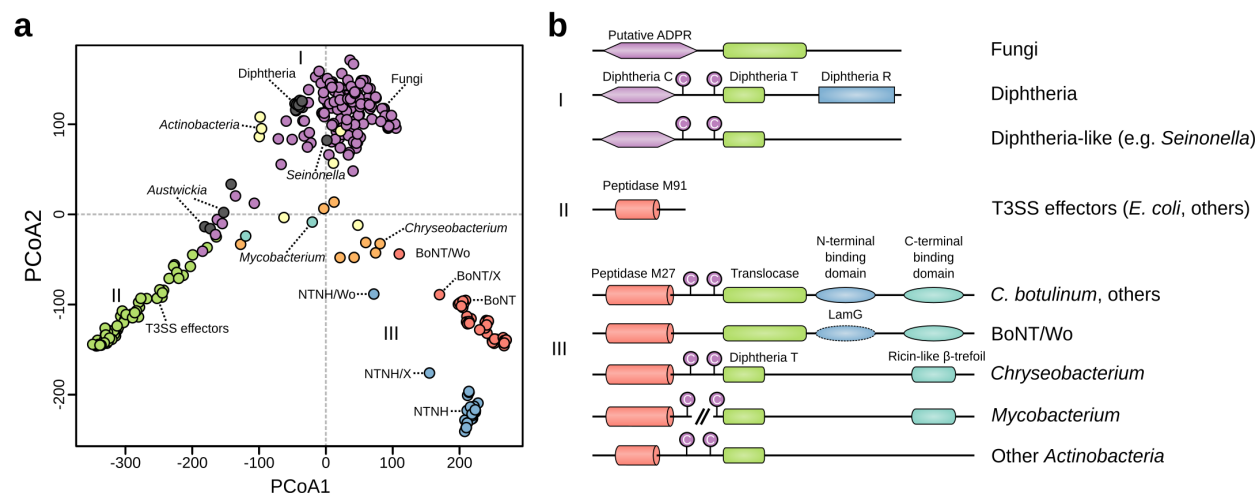

**Figure 1. Visualization of sequence and domain architectural similarities between BoNTs and their evolutionary relatives detected by PSI-BLAST.** *A*) PCoA ordination of pairwise percent similarities reveals relationships between the sequence families surveyed in this study. Predicted toxins from entomopathogenic fungi cluster distinctly from BoNTs, and associate more closely with diphtheria toxins (cluster I). Type III secretion system (T3SS) effectors group separately (cluster II). BoNT and NTNH form distinct groups, with more divergent relatives such as the *Weissella* “BoNT/Wo” clustering outside them. The next closest relatives are the BoNT-like toxins found in *Chryseobacterium*, followed by putative toxins from other *Actinobacteria* (cluster III), which span the distance between groups, having similarities to each. *B*) Predicted domain architectures of the sequences identified in this survey. Homologs detected by PSI-BLAST include proteins with BoNT-like domain architectures (e.g., *Weissella* “BoNT/Wo”) or share only a single domain (e.g., the fungal family). For the sake of simplicity, only a single sequence was chosen to represent the subgroups, and domain structures can vary further within the groups. Notably, genes encoding *M. chelonae* BoNT-like proteins appear to be split into two components (one encoding the “light chain” M27-like peptidase, and the second encoding the “heavy chain” translocation domain and receptor-binding domain).



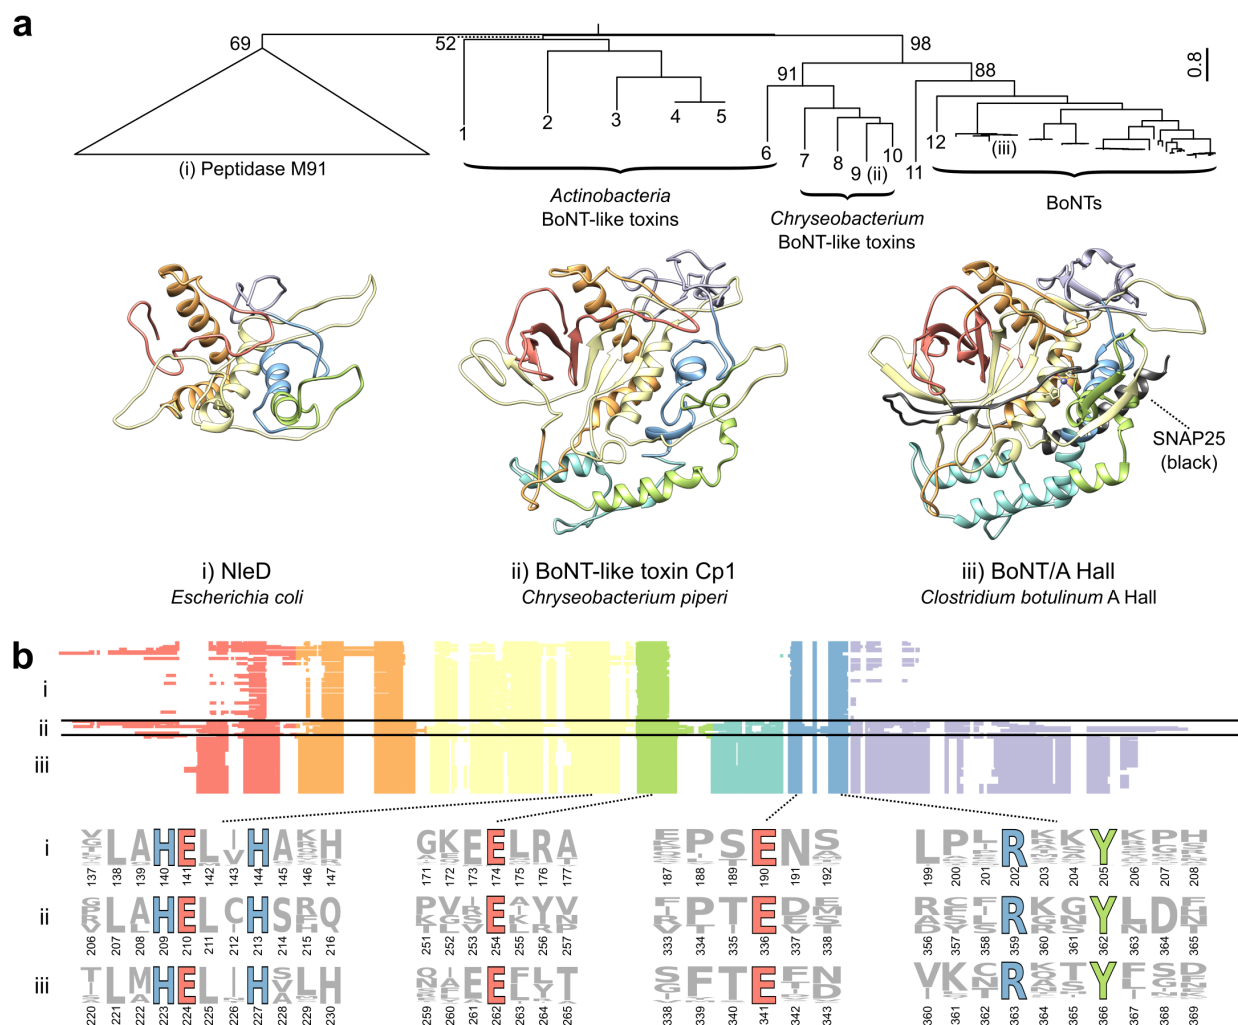

**Figure 2. Comparison of the BoNT-LC with homologous domains from BoNT-like toxins and M91 family type III secretion system effectors.** *A*) Phylogenetically, BoNTs form a statistically supported clade with BoNT-like toxins distinct from peptidase M91. Structural comparison of BoNT/A (PDB 3BTA) (iii) with structural models of *Chryseobacterium* Cp1 (ii) and *E. coli* NleD (i) reveals two regions that are unique to BoNTs and BoNT-like proteins: the lower alpha-helical region, which interacts directly with SNARE substrates, and the C-terminal region that plays a role in catalytic product removal. *B*) The protease domains of type III secretion system effector proteases (i), BoNT-like toxins (ii), and BoNT-LCs (iii) have key conserved sequence features. These include the HEXxH zinc-coordinating and catalytic residues, the third zinc ligand E261, and the active site-refining E350 and RxxY motif. As depicted in the multiple alignment, two insertion regions appear unique to BoNTs and BoNT-like proteins, shown in teal and purple respectively. The identities of proteins labeled 1-12 are: 1 - WP\_055473237.1, *Streptomyces pathocidini*; 2 - GAO13068.1, *Streptomyces* sp. NBRC\_110027; 3 - WP\_083906476.1, *Acaricomes phytoseiuli*; 4 - WP\_037712107.1, *Streptomyces* sp. AA4; 5 - EFL04418.1, *Streptomyces* sp. AA4; 6 - WP\_070931163.1, *Mycobacterium chelonae*; 7 - WP\_034681281.1, *C. piperi*; 8 - WP\_034687877.1, *C. piperi*; 9 - WP\_034687872.1, *C. piperi*; 10 - WP\_034687193.1, *C. piperi*; 11 - WP\_027699549.1, *Weissella oryzae* SG25; 12 - BAQ12790.1, *Clostridium botulinum* str 111 (BoNT/X).

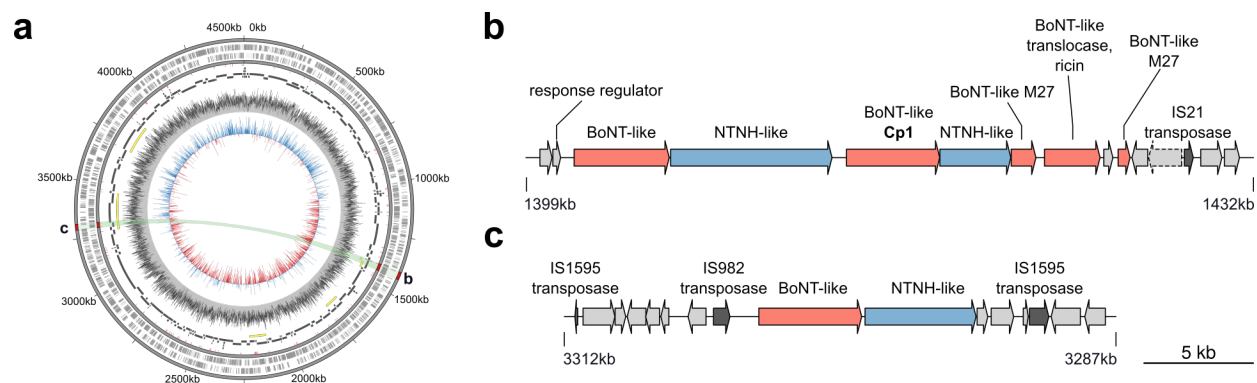

**Figure 3. BoNT-like toxins reside within two toxin-rich gene clusters in the genome of *Chryseobacterium piperi*.** A) Re-sequencing with a combination of Illumina and PacBio resulted in a closed genome with a single circular chromosome. Yellow bands reflect the local alignment of the toxin containing contigs (shown in B and C) from the initial JPRJ01 assembly against an intermediate assembly (black), and the closed genome (CP023049). Annotated insertion sequences (red ticks), SRX3229522 read mapping to CP023049 (gray histogram), and GC skew (blue/red histogram) are also indicated. The closed genome contains two separate toxin gene clusters (shown in B and C). Transposase genes are found within and nearby both clusters, which likely contributed to the mobility and duplication of these elements. Full gene annotations for the clusters are available in the Supplementary Information.



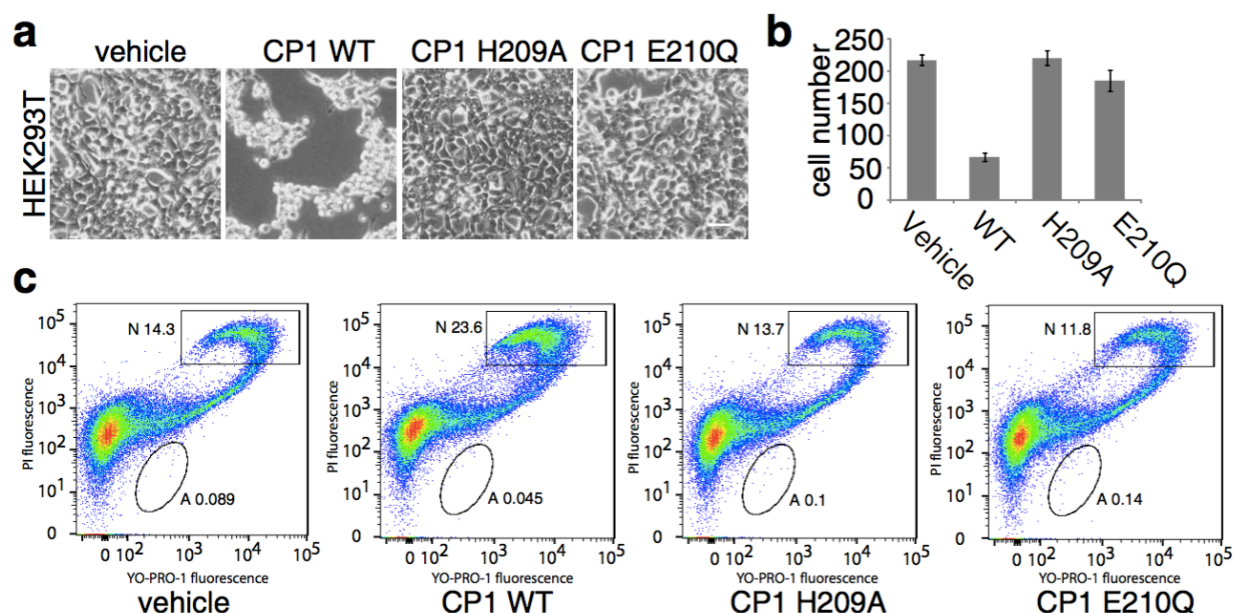

**Figure 4. Expression of CP1-LC in HEK293T cell caused necrotic cell death, which depends on its metalloprotease activity.** A) HEK293T cells were transfected with vehicle vector (pcDNA3.1(+)), CP1-LC WT and mutants (H209A, E210Q) which abolished the metalloprotease activity. Cells were observed and images were taken under inverted microscopy after 48 h. Only cells transfected with CP1-LC WT showed dramatically cell death phenotype which were shrunken and detached from plate. B) Cell numbers were counted in defined field of images taken in A). C) Cell apoptosis assay was carried out with Chromatin Condensation/Membrane Permeability/Dead cell Apoptosis kit. Transfected cells with vehicle vector, CP1-LC WT and mutant plasmids were analyzed with flow cytometer. Only transfection with CP1-LC WT plasmid enhanced necrotic population of HEK 293T cells which is not observed in inactive form CP1-LC plasmids.

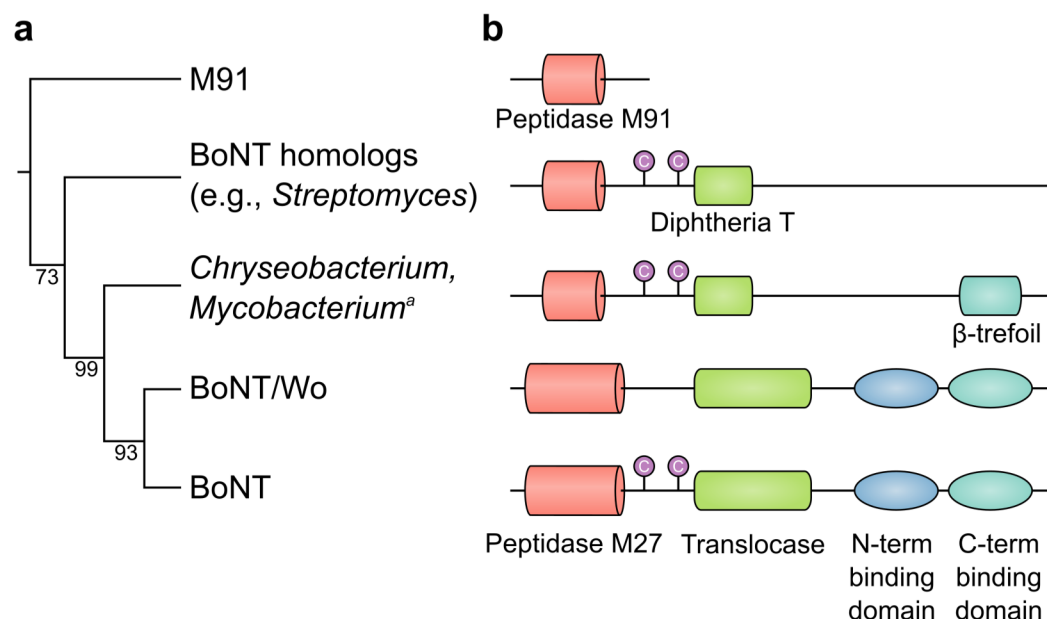

**Figure 5. A model of BoNT evolution from ancestral toxins.** *A*) Simplified cladogram based on an alignment of the BoNT peptidase domain (the most conserved region in BoNTs). *B*) Domain architecture changes over BoNT family tree. In the near-BoNT clades, all BoNT domains are detectable. Other more ancestral BoNT homologs lack identifiable BoNT domains, highlighting the divergent nature of the BoNT family.
